# Supplementary material for: Posidonia oceanica lower depth limits along a latitudinal gradient in the eastern Adriatic Sea
Source: publisher site journal article supplement (doi:10.1515/bot-2019-0097), 2020-05-05
Supplement: Supplementary file 1 [file bot-2019-0097_suppl.docx]

**Supplementary material**

***Posidonia oceanica* lower depth limits along a latitudinal gradient in the eastern Adriatic Sea**

Ivana Zubak, Hrvoje Cizmek and Melita Mokos

DOI 10.1515/bot-2019-0097

**Supplementary Table S1:** *Posidonia oceanica*: surveyed locations with GPS coordinates (longitude and latitude), latitude cluster, and recorded lower depth limit (m).

| **Location** | **Longitude** | | **Latitude** | | **Latitude cluster** | **Depth (m)** |
| --- | --- | --- | --- | --- | --- | --- |
| 1 | 14.765716 | E | 44.930155 | N | 44.5 | 27 |
| 2 | 14.304048 | E | 44.905314 | N | 44.5 | 26 |
| 3 | 14.336214 | E | 44.813802 | N | 44.5 | 26 |
| 4 | 14.346675 | E | 44.774417 | N | 44.5 | 25 |
| 5 | 14.488167 | E | 44.717449 | N | 44.5 | 26 |
| 6 | 14.279044 | E | 44.655453 | N | 44.5 | 26 |
| 7 | 14.267034 | E | 44.639444 | N | 44.5 | 24 |
| 8 | 14.523207 | E | 44.606371 | N | 44.5 | 26 |
| 9 | 14.859825 | E | 44.545169 | N | 44.5 | 27 |
| 10 | 14.599499 | E | 44.530810 | N | 44.5 | 26 |
| 11 | 14.573901 | E | 44.481323 | N | 44.5 | 25 |
| 12 | 14.551816 | E | 44.439998 | N | 44.0 | 26 |
| 13 | 14.706812 | E | 44.316334 | N | 44.0 | 28 |
| 14 | 14.804176 | E | 44.164406 | N | 44.0 | 27 |
| 15 | 14.871973 | E | 44.147453 | N | 44.0 | 27 |
| 16 | 14.891962 | E | 44.118099 | N | 44.0 | 27 |
| 17 | 15.112688 | E | 44.098878 | N | 44.0 | 26 |
| 18 | 15.293232 | E | 44.022995 | N | 44.0 | 24 |
| 19 | 15.067053 | E | 44.003608 | N | 44.0 | 26 |
| 20 | 15.264788 | E | 43.914233 | N | 43.5 | 25 |
| 21 | 15.172296 | E | 43.900869 | N | 43.5 | 24 |
| 22 | 15.190432 | E | 43.897261 | N | 43.5 | 27 |
| 23 | 15.392813 | E | 43.884738 | N | 43.5 | 25 |
| 24 | 15.742991 | E | 43.623513 | N | 43.5 | 32 |
| 25 | 15.199681 | E | 43.869562 | N | 43.5 | 27 |
| 26 | 15.495746 | E | 43.829269 | N | 43.5 | 28 |
| 27 | 15.629267 | E | 43.758953 | N | 43.5 | 26 |
| 28 | 15.473726 | E | 43.719203 | N | 43.5 | 29 |
| 29 | 15.607124 | E | 43.715329 | N | 43.5 | 28 |
| 30 | 15.784618 | E | 43.673215 | N | 43.5 | 26 |
| 31 | 15.630820 | E | 43.657354 | N | 43.5 | 28 |
| 32 | 15.180072 | E | 43.872159 | N | 43.5 | 32 |
| 33 | 16.115140 | E | 43.421745 | N | 43.0 | 30 |
| 34 | 16.390661 | E | 43.330041 | N | 43.0 | 27 |
| 35 | 16.527790 | E | 43.204065 | N | 43.0 | 27 |
| 36 | 16.687865 | E | 43.193749 | N | 43.0 | 28 |
| 37 | 16.750889 | E | 43.163898 | N | 43.0 | 27 |
| 38 | 17.191435 | E | 43.124002 | N | 43.0 | 28 |
| 39 | 16.678134 | E | 43.098672 | N | 43.0 | 27 |
| 40 | 16.571924 | E | 43.085421 | N | 43.0 | 31 |
| 41 | 16.723375 | E | 43.081409 | N | 43.0 | 30 |
| 42 | 16.021504 | E | 42.983623 | N | 42.5 | 30 |
| 43 | 17.202137 | E | 42.916417 | N | 42.5 | 36 |
| 44 | 17.377071 | E | 42.804651 | N | 42.5 | 32 |
| 45 | 17.359150 | E | 42.804096 | N | 42.5 | 33 |
| 46 | 17.326691 | E | 42.779536 | N | 42.5 | 36 |
| 47 | 16.995563 | E | 42.777329 | N | 42.5 | 30 |
| 48 | 16.981306 | E | 42.775335 | N | 42.5 | 32 |
| 49 | 17.111165 | E | 42.765419 | N | 42.5 | 32 |
| 50 | 17.113327 | E | 42.761365 | N | 42.5 | 33 |
| 51 | 16.951661 | E | 42.754053 | N | 42.5 | 36 |
| 52 | 17.414736 | E | 42.753083 | N | 42.5 | 33 |
